# Supplementary material for: How Vision Is Impaired From Aging to Early and Intermediate Age-Related Macular Degeneration: Insights From ALSTAR2 Baseline
Source: PubMed Central journal article supplement — Transl Vis Sci Technol. 2022 Jul 21;11(7):17. doi: 10.1167/tvst.11.7.17 (PMC9315068; doi:10.1167/tvst.11.7.17), 2022-07-21
Supplement: tvst-11-7-17_s002.pdf [file tvst-11-7-17_s002.pdf]

## Supplemental Figure S2

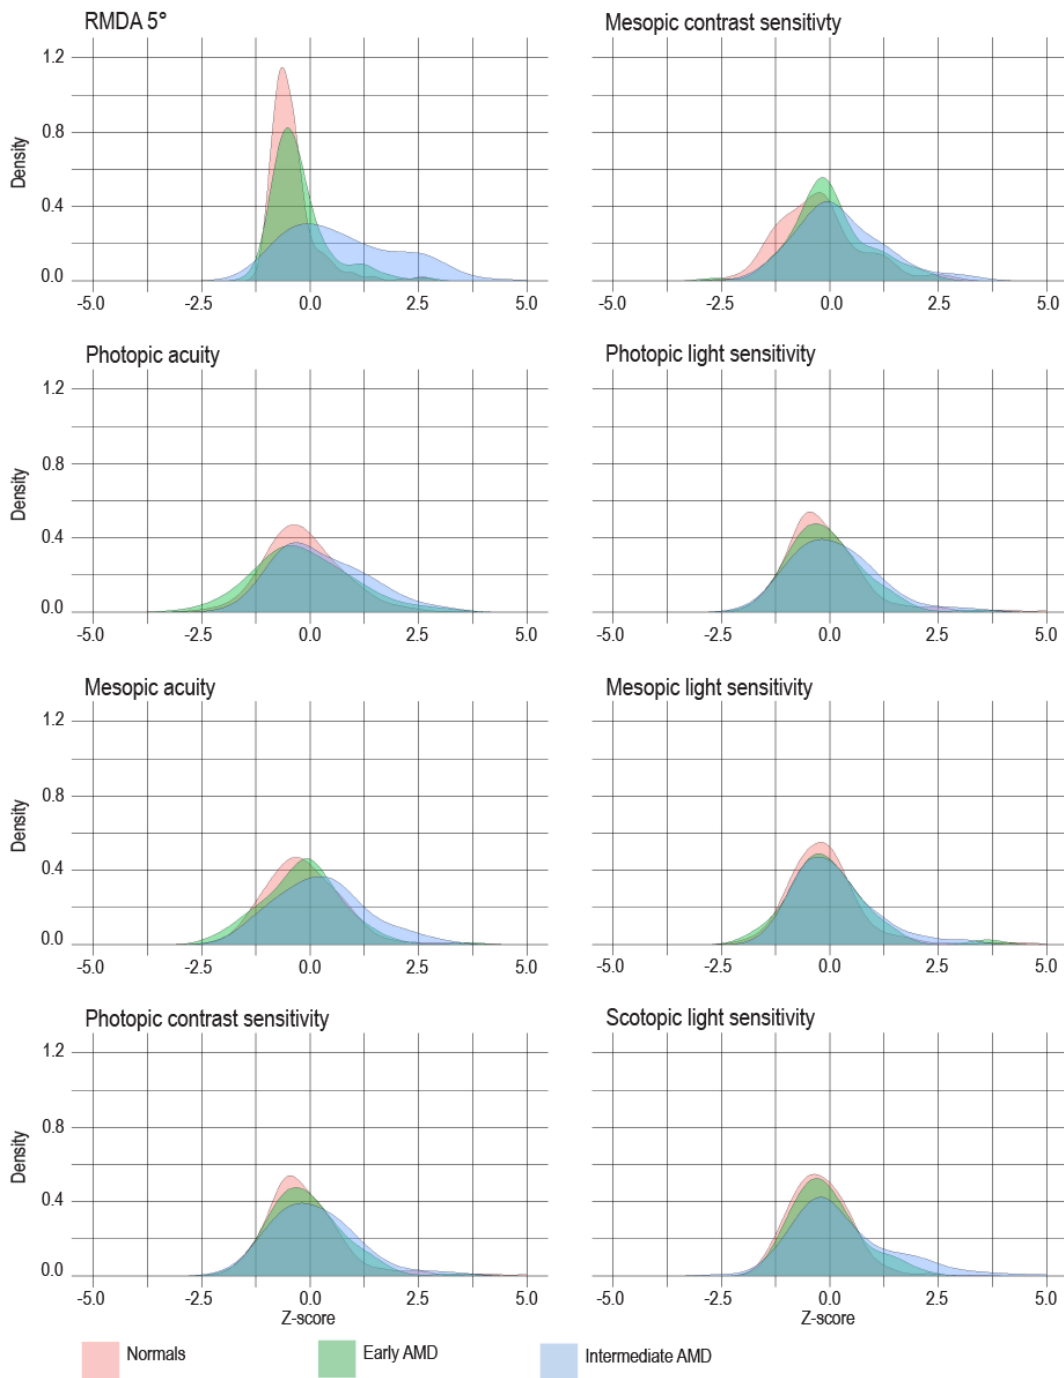

**Supplemental Figure S2.** Z-score probability density functions (PDF) for all visual functions stratified by AMD status and severity (using the Beckman classification system). The abscissa is z-score, and the ordinate is density. To facilitate comparison among visual function tests, the scales for all contrast sensitivity and light sensitivity measures were reversed so higher z-scores represent worse visual function, as they do for RMDA and visual acuity. Compared to normal eyes and early AMD eyes, the RMDA z-scores for intermediate AMD eyes are skewed right, but less so compared to the AREDS distributions. The much larger density for RMDA above 0 standard deviations (in blue) than for the other visual functions remains using the Beckman classification. Prior to standardization, units of measurement were as follows: RMDA, rod intercept time (RIT); photopic and mesopic acuity,  $\log_{10}$  minimum angle of resolution (logMAR); photopic and mesopic contrast sensitivity, log sensitivity; photopic, mesopic, and scotopic light sensitivity, decibels of attenuation (dB). To facilitate comparison among visual function tests, the scales for all contrast sensitivity and light sensitivity measures were reversed so higher z-scores represent worse visual function.
