# Supplementary material for: How Vision Is Impaired From Aging to Early and Intermediate Age-Related Macular Degeneration: Insights From ALSTAR2 Baseline
Source: PubMed Central journal article supplement — Transl Vis Sci Technol. 2022 Jul 21;11(7):17. doi: 10.1167/tvst.11.7.17 (PMC9315068; doi:10.1167/tvst.11.7.17), 2022-07-21
Supplement: tvst-11-7-17_s003.pdf [file tvst-11-7-17_s003.pdf]

### Supplemental Figure S3

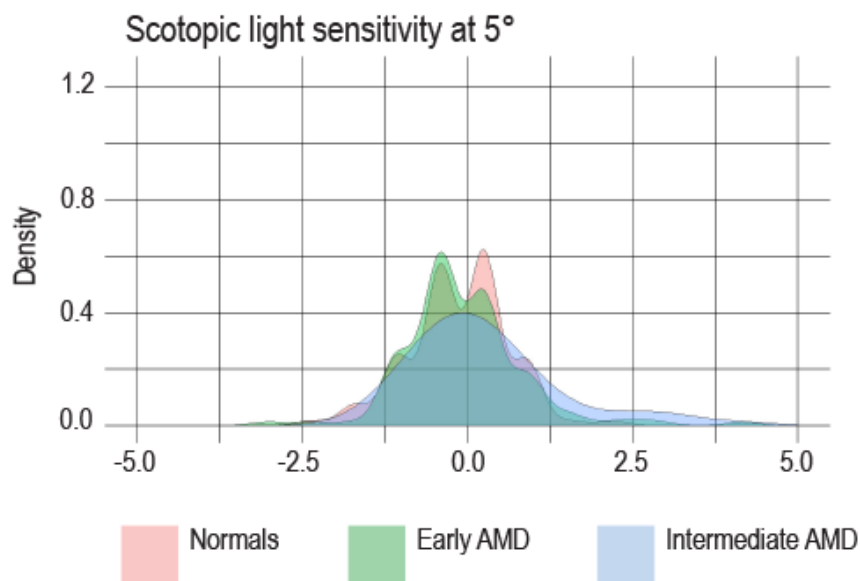

**Supplemental Figure S3.** Z-score probability density functions (PDF) for scotopic light sensitivity at 5° RMDA test spot stratified by AMD status and severity (AREDS 9-step classification). Similar to all other visual functions presented in Figure 4 and Figure S2, scotopic light sensitivity at the RMDA test location is unable to differentiate AMD severity as compared to RMDA at 5°.
