# Supplementary material for: How Vision Is Impaired From Aging to Early and Intermediate Age-Related Macular Degeneration: Insights From ALSTAR2 Baseline
Source: PubMed Central journal article supplement — Transl Vis Sci Technol. 2022 Jul 21;11(7):17. doi: 10.1167/tvst.11.7.17 (PMC9315068; doi:10.1167/tvst.11.7.17), 2022-07-21
Supplement: tvst-11-7-17_s004.pdf [file tvst-11-7-17_s004.pdf]

**Supplemental Table S1.** RMDA stratified by AMD status and SDD versus No SDD status

| RMDA 5°, RIT in minutes                                                                                                                                 | Normal Macular Health (N = 238)      | Early AMD (N = 139)                  | Intermediate AMD (N = 101)          | P-values |                      |                             |                            |
|---------------------------------------------------------------------------------------------------------------------------------------------------------|--------------------------------------|--------------------------------------|-------------------------------------|----------|----------------------|-----------------------------|----------------------------|
|                                                                                                                                                         |                                      |                                      |                                     |          |                      |                             |                            |
|                                                                                                                                                         | No SDD N = 218<br>SDD N = 20 (8.4%)* | No SDD N = 106<br>SDD N = 33 (23.7%) | No SDD N = 53<br>SDD N = 48 (47.5%) |          |                      |                             |                            |
|                                                                                                                                                         | Mean (SD)                            | Mean (SD)                            | Mean (SD)                           | Overall  | Normal vs. Early AMD | Normal vs. Intermediate AMD | Early vs. Intermediate AMD |
| No SDD                                                                                                                                                  | 11.9 (5.0)                           | 14.3 (7.7)                           | 24.4 (10.8)                         | <0.0001  | 0.0040               | <0.0001                     | <0.0001                    |
| SDD                                                                                                                                                     | 13.5 (9.0)                           | 18.6 (11.9)                          | 34.3 (12.3)                         | <0.0001  | 0.1044               | <0.0001                     | <0.0001                    |
| *Total sample N=478, SDD present N = 101 (21.1%). Note, 3 eyes in the sample could not be assessed for SDD because of no images or high quality images. |                                      |                                      |                                     |          |                      |                             |                            |
