# Supplementary material for: How Vision Is Impaired From Aging to Early and Intermediate Age-Related Macular Degeneration: Insights From ALSTAR2 Baseline
Source: PubMed Central journal article supplement — Transl Vis Sci Technol. 2022 Jul 21;11(7):17. doi: 10.1167/tvst.11.7.17 (PMC9315068; doi:10.1167/tvst.11.7.17), 2022-07-21
Supplement: tvst-11-7-17_s005.pdf [file tvst-11-7-17_s005.pdf]

**Supplemental Table S2.** Mean z-scores for each group and z-score differences across disease severity

| Visual function                  | Normal Macular Health<br>N=239 <sup>2</sup> | Early AMD<br>N=139 <sup>2</sup> | Intermediate AMD<br>N=103 <sup>2</sup> | Difference in mean z-score between normal and intermediate AMD |
|----------------------------------|---------------------------------------------|---------------------------------|----------------------------------------|----------------------------------------------------------------|
| RMDA 5°                          | -0.43                                       | -0.13                           | 1.16                                   | 1.59                                                           |
| Photopic acuity                  | -0.10                                       | -0.13                           | 0.40                                   | 0.50                                                           |
| Mesopic acuity                   | -0.16                                       | -0.15                           | 0.56                                   | 0.72                                                           |
| Photopic contrast sensitivity    | -0.21                                       | -0.06                           | 0.51                                   | 0.72                                                           |
| Mesopic contrast sensitivity     | -0.21                                       | -0.10                           | 0.49                                   | 0.70                                                           |
| Photopic light sensitivity       | -0.06                                       | -0.18                           | 0.36                                   | 0.42                                                           |
| Mesopic light sensitivity        | -0.11                                       | -0.15                           | 0.48                                   | 0.59                                                           |
| Scotopic light sensitivity       | -0.20                                       | -0.09                           | 0.59                                   | 0.79                                                           |
| Scotopic light sensitivity at 5° | -0.13                                       | -0.07                           | 0.43                                   | 0.56                                                           |

<sup>1</sup> Higher z-scores are indicative of worse function, with the scales of contrast and light sensitivity measures reversed for comparison to other visual functions.

<sup>2</sup> The N is reduced to 193 for mesopic contrast sensitivity among normals. The N is reduced for normals, early, and intermediate AMD, each respectively, for photopic light sensitivity (209, 122, 97), mesopic light sensitivity (197, 124, 83), and scotopic light sensitivity (220, 131, 93). For the scotopic light sensitivity at 5° RMDA test spot, the N is 219 for normals, 131 for early AMD, and 88 for intermediate AMD.
